# Supplementary material for: miR-450a Acts as a Tumor Suppressor in Ovarian Cancer by Regulating Energy Metabolism
Source: Oxford University Press journal article supplement (doi:10.1158/0008-5472.can-19-0490), 2019-05-17
Supplement: 00085472can190490-sup-216913_2_supp_5502316_pr98cp.xlsx [file 00085472can190490-sup-216913_2_supp_5502316_pr98cp.xlsx]

## Sheet: Sheet1
miR-450a exclusive targets	Aligment region	Cluster sequence
ACO2	coding	AACATTAACATTGTTcgcaaaC
ANKRD16	intron	AAAAAAAAAATcgcaaaACATCTCAAT
AP2B1	coding	TCATCAGGGACATCTTCcgcaaaTACCCCAACAA
ARFIP1	coding	AATCTTGGACCACGTGAcgcaaaCACT
ARL8A	coding	TTTCAACATGcgcaaaATCACCAAAGGGAATGTGACTATCAA
ASS1	coding	ACCGGGAAGTGcgcaaaATCAAACAA
ATP5B	coding	ACTATGCGGcgcaaaCATCTCCTTCGCCAAAA
ATP6V0A1	coding	AATTAAAATTTATACTTcgcaaaACT
B3GNT5	3'UTR	GTCGGAAACAcgcaaaACAAAAC
BMF	3'UTR	ACCCCTCAAACATGTcgcaaaAT
CALD1	coding	AACAAAAAGcgcaaaACCTACAAA
CCDC12	intron	TATTATTCTGcgcaaaACTCTCTT
CCDC147	intron	GATCAATTTAcgcaaaACTG
CCDC41	coding	AACTCTCTCTACTTcgcaaaA
CCNT2	coding	AAAATACCTATcgcaaaTACT
CES3	coding	AAAATcgcaaaCACCTTGGCC
CITED2	5'UTR	GTCTTCGGAGCAGAAATcgcaaaAACG
CNOT11	3'UTR	CTATCCCAAAAAAAGTTCcgcaaaAAA
EFNB1	5'UTR	AGGCTTCGGGGGcgcaaaCTAAT
FAT1	coding	ACAGTATcgcaaaTTTAAATC
FHIT	intron	ATTACAATATCATTcgcaaaA
FRS2	coding	TATACACCcgcaaaCGTGACTCA
FYN	coding	TCAAACATTATAAAATTcgcaaaCTT
FZD6	coding	CATTTTCTTCCTCTcgcaaaT
GIT2	intron	CACAAATACTAATcgcaaaACTTA
GOLIM4	coding	TTGGAAGAGGAACATcgcaaaCAA
GTF3C4	coding	CCATTCACAGATcgcaaaCA
H2AFY2	coding	TAAAGGAGCTTcgcaaaTCCCAA
HEATR2	coding	CCAAcgcaaaATCCTACTATCA
HIST1H1E	coding	TCTGCAGGTGCGGCCAAGcgcaaaGCGTCTGGGCCCCCGGTGTCCGAGCTCATTACTAAAGCTGTTGCCGCCTCCAA
HIST1H4C	coding	TCACCTATACGGAGCACGCCAAGcgcaaaACTGTCACAGCCATGGATGTAGTATATGCCCTAAAAC
HIST1H4D	stop codon	CTTCGGCGGCTGAGCTTACCTCTACAGTACACTACcgcaaaACCAACGGCCCTTTTCAGGGCCAC
HS6ST2	coding	TCAGGAACAAcgcaaaTTTCT
JUN	coding	AGCCGCCGGTCTAcgcaaaCCTCA
MAML1	coding	CTCCATATcgcaaaGCAACCTCAT
MANEA	coding	ATGGAACAcgcaaaACACTC
MID1	intron-coding	AAGGTGATGAGGCTTcgcaaaCTGGCTCAGCAGATTGCA
MT-ND2	coding	CCTTCTCCTCACTCTCTCAATCTTATCCATCATAGCAGGCAGTTGAGGTGGATTAAACCAAACCCAGCTAcgcaaaATCT
MTG2	coding	CCCCACGCAATCGTcgcaaaCAA
MYRIP	coding	ACTTCAATCTTcgcaaaAAA
NSMCE2	intron	TAAACTATATATTcgcaaaACT
PABPC1	coding	ACGGAACTTAAGcgcaaaTTTGAACAGATGAAACAA
PITPNB	intron	CATTTTTCTACTTTTAcgcaaaA
PLXNA2	3'UTR	CACCAAACACTTcgcaaaAACA
PRRC2C	coding	ATCTAACCATAcgcaaaAACCAGACGAGCA
PTP4A2	3'UTR	ATTTTTAACTAAAcgcaaaTCT
RBBP6	coding	AAACCATCACCAAAGcgcaaaAT
RHEB	intron	AATAACAAGTTcgcaaaCAA
RNPS1	coding	CTCCTTCACCTACCAAAcgcaaa
RP1-170O19.22	processed transcript	CAAATCAAATcgcaaaCTAAT
RP11-96K19.5	antisense	ATCAAGGAACAAATcgcaaaA
RP4-631H13.5	processed pseudogene	CTGATTcgcaaaCCTCCCTTCCA
RP6-24A23.3	antisense	TAAACAACCTTAcgcaaaTA
RPL27	coding	CTTGTCCTGGCTGGACGCTACTCCGGAcgcaaaGCTGTCATC
SCAF11	coding	CAACcgcaaaTGAATGTAAT
SEC31A	coding	AAAAAATACTTcgcaaaATCCCAAA
SF3B2	coding	TTTTAAGcgcaaaTACCTGCAGGGCAAAC
SGOL2	coding	TCACTCACTCTTTTTAAcgcaaaAA
SKP2	coding	CTCTcgcaaaAAACTCAAATTTA
SLC16A1	3'UTR	TTTTTTTCTGATcgcaaaACT
SLC25A10	coding	TTTCTGGAACAGCTAcgcaaaAACTTT
SLIRP	coding	CCAAAACTTCcgcaaaCATCT
SLX4IP	coding	TACTTGGAAGTTcgcaaaCA
SON	coding	ATCATcgcaaaCATTTTCTCTTTA
SOX12	5'UTR	ATTCCTCGGCCCCcgcaaaACAA
SRSF5	processed transcript	CCCGTAGTcgcaaaTCTTACAGCCGGTCAA
TIMMDC1	3'UTR	TAAATAAAACATTTcgcaaaA
TOPBP1	coding	AATACTTTGTTcgcaaaTCCAAT
VIM	coding	GATGTTGACAATGCGTCTCTGGCACGTCTTGACCTTGAAcgcaaaG
WDR55	coding	ATGACTACCGTCGGcgcaaaA
WDTC1	coding	ACACACcgcaaaTATCTTCT
ZFR	coding	ATGGATCCATTACcgcaaaTGAGCCAAC
ZMYND8	coding	AAATCACAAATTGAcgcaaaTA
ZNF468	coding	TTTTCAGTcgcaaaTCAAAC
ZNF530	coding	TAGTcgcaaaACTCACCTAA
ZRANB2	coding	ATCTGGTGATcgcaaaAAAA
